# Supplementary material for: Luminescent solvent-free liquids based on Schiff-base boron difluoride complexes with polyethylene glycol chains
Source: Royal Society of Chemistry journal article supplement (doi:10.1039/d3sm01590d), 2024-01-01
Supplement: d3sm01590d1.pdf [file d3sm01590d1.pdf]

## Supporting Information

### **Luminescent solvent-free liquids based on Schiff-base boron difluoride complexes with polyethylene glycol chains**

Masahiro Ikeshita,<sup>\*a</sup> Miku Ichinose<sup>a</sup> and Takashi Tsuno<sup>\*a</sup>

<sup>a</sup> Department of Applied Molecular Chemistry, College of Industrial Technology, Nihon University, Narashino, Chiba 275-8575, Japan

#### **Table of Contents**

- 1. NMR Chart**
- 2. Single X-ray Structure Analysis**
- 3. Photophysical Properties**
- 4. Computational Details**
- 5. Cartesian Coordinates (in Å)**

## 1. NMR Chart

(a)

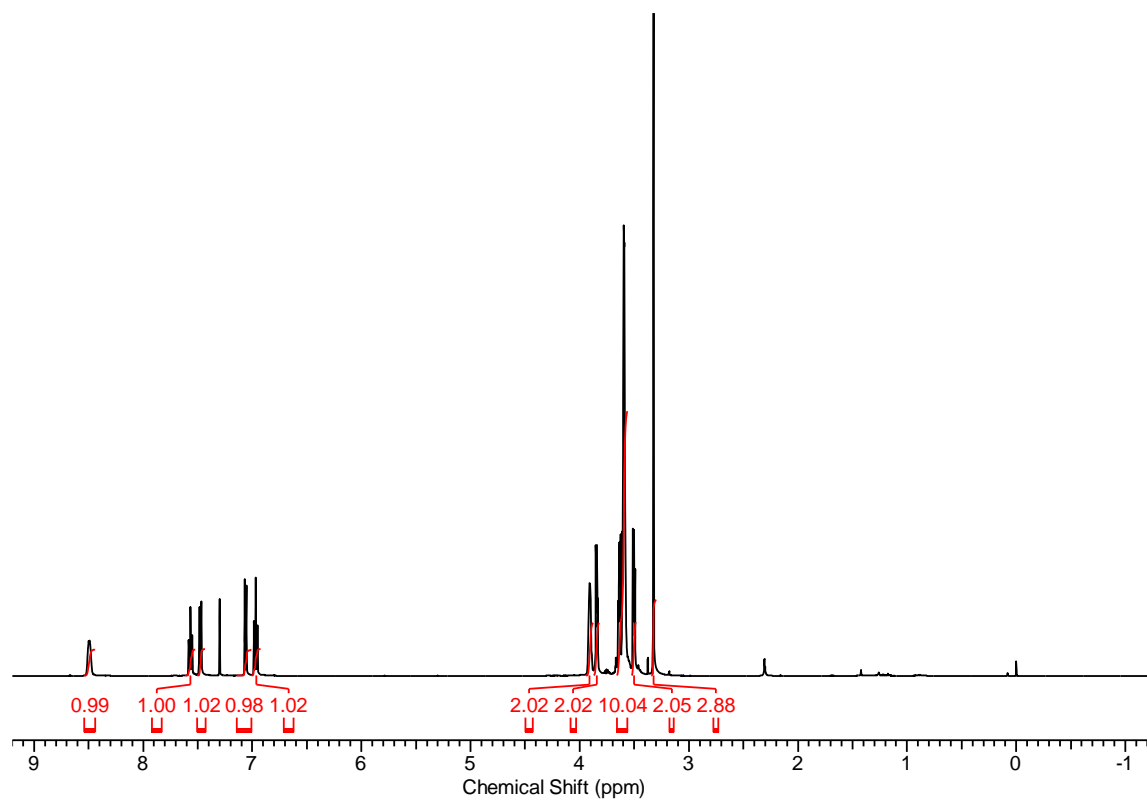

(b)

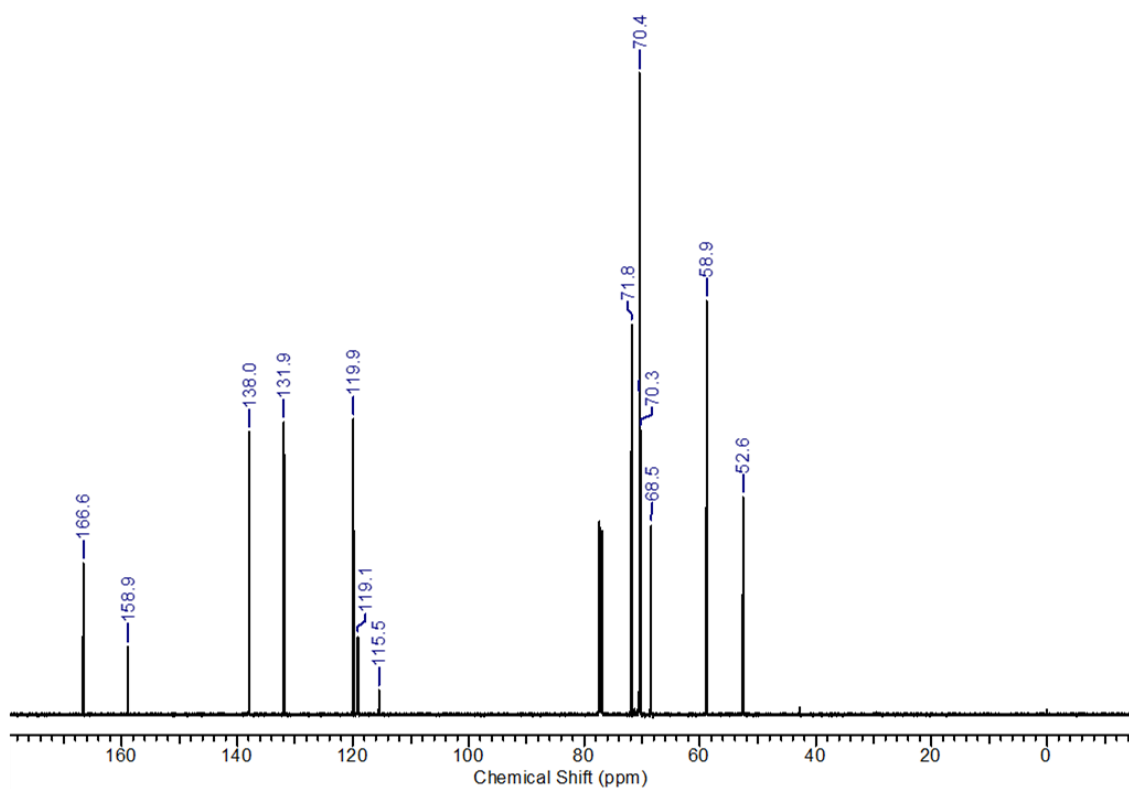

**Fig. S1** (a)  $^1\text{H}$  and (b)  $^{13}\text{C}$  NMR spectra of **1a** in  $\text{CDCl}_3$ .

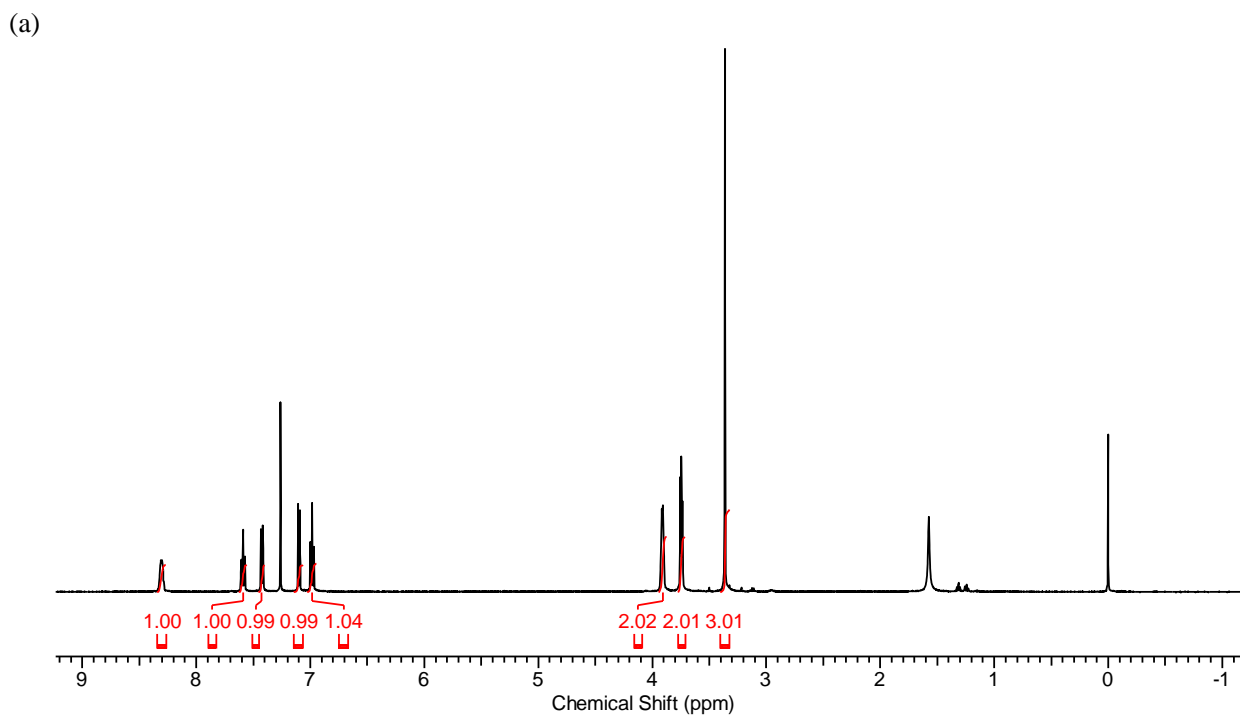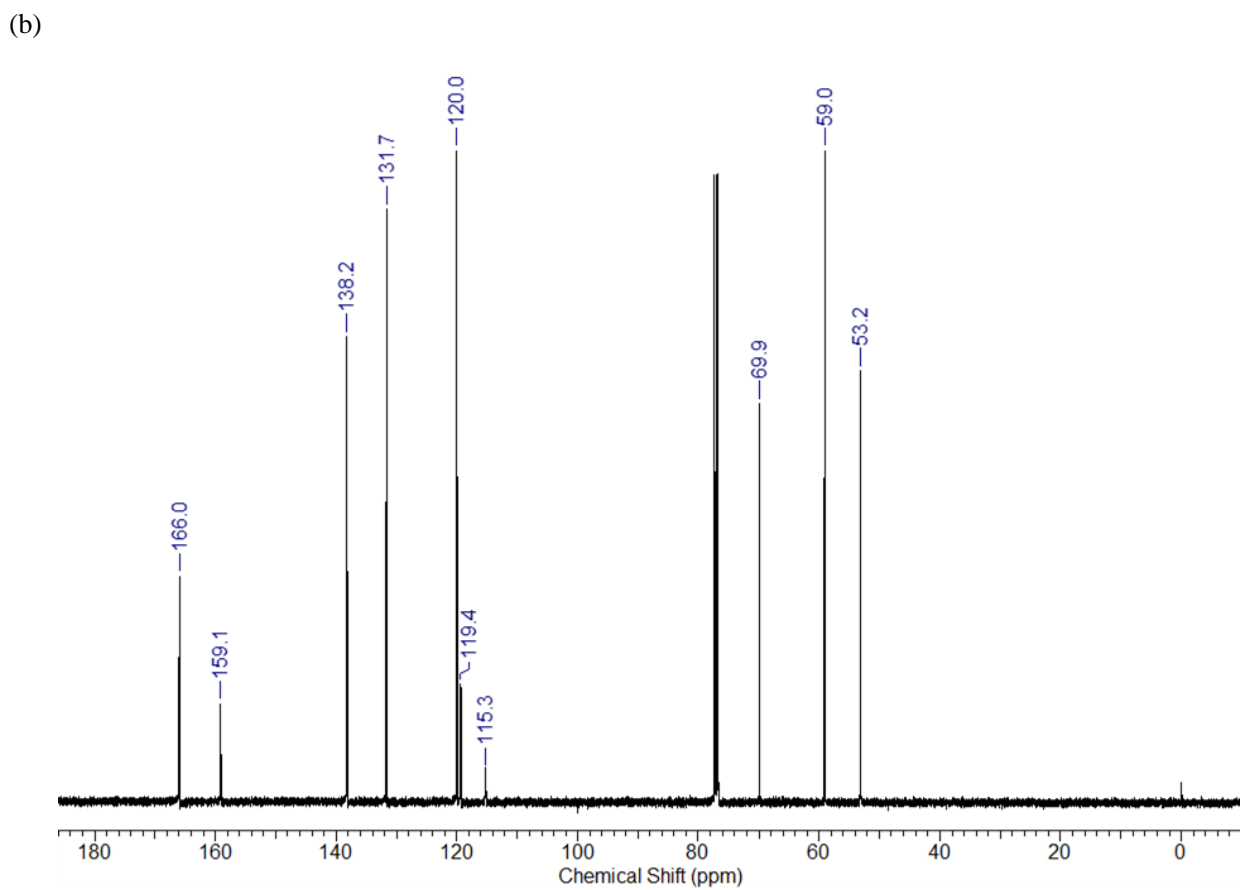

**Fig. S2** (a)  $^1\text{H}$  and (b)  $^{13}\text{C}$  NMR spectra of **1b** in  $\text{CDCl}_3$ .

(a)

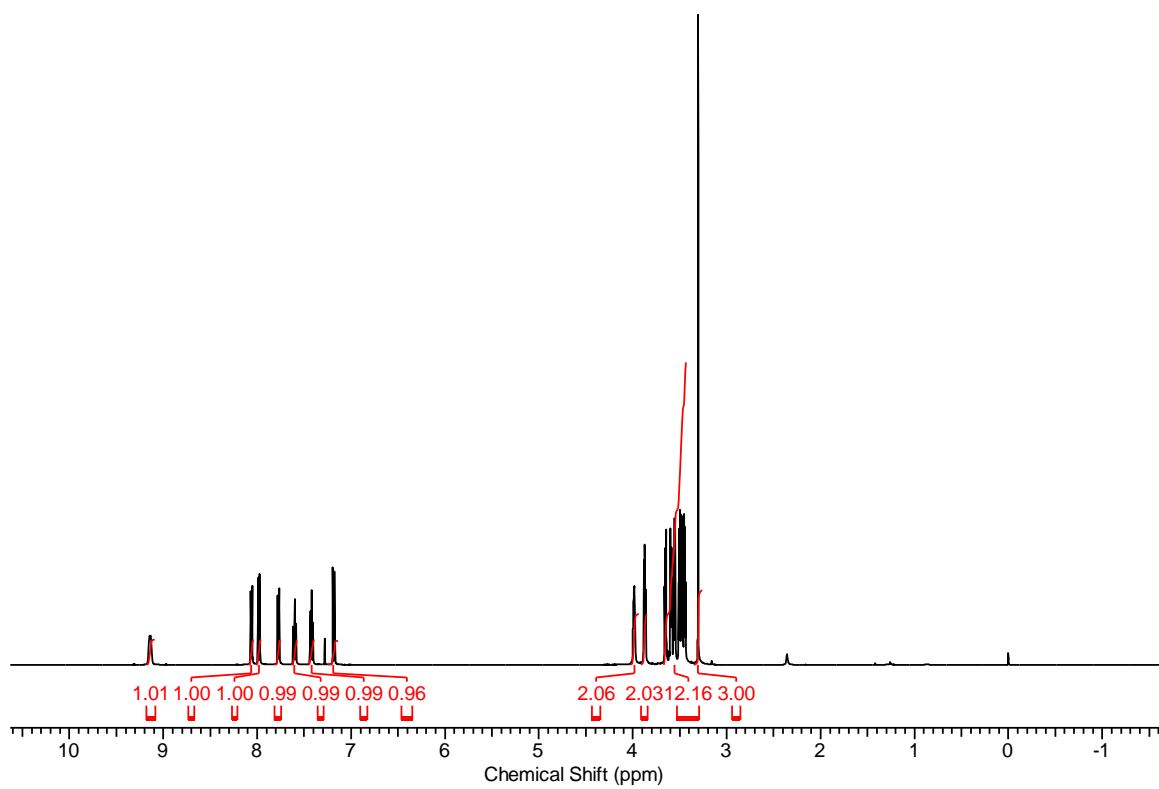

(b)

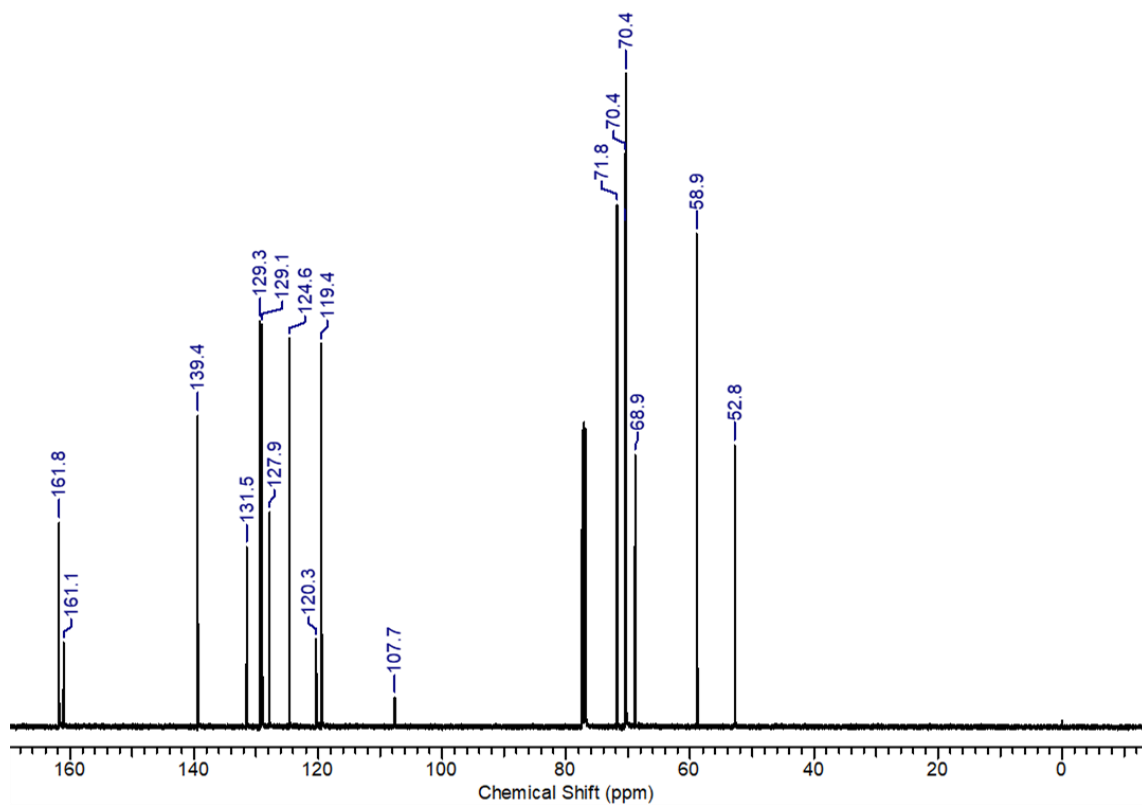

**Fig. S3** (a) <sup>1</sup>H and (b) <sup>13</sup>C NMR spectra of **2a** in CDCl<sub>3</sub>.

(a)

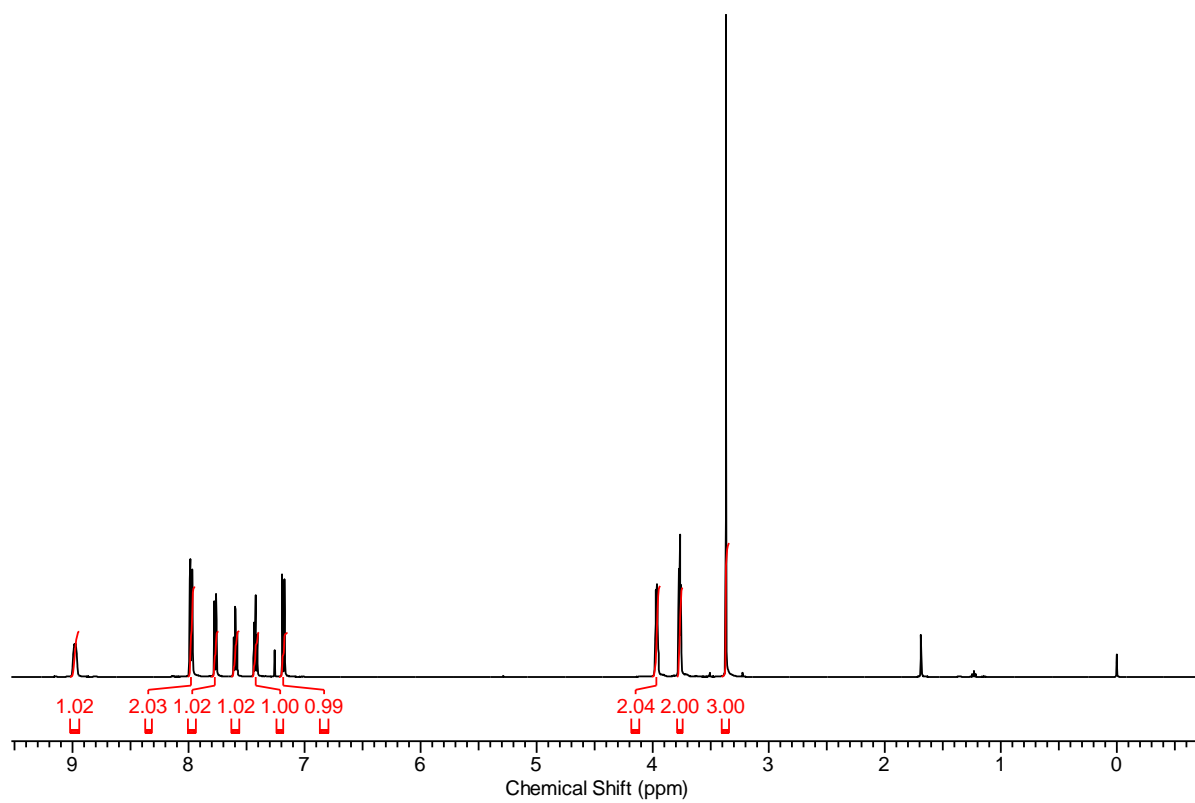

(b)

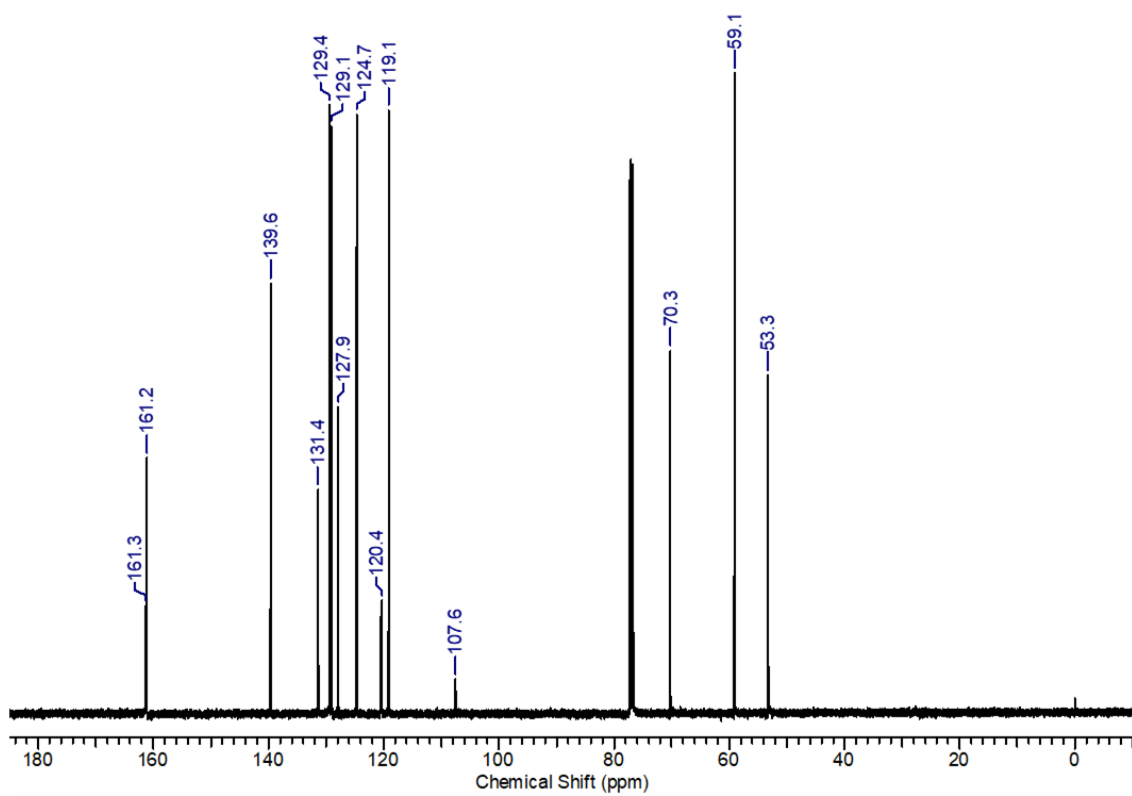

**Fig. S4** (a) <sup>1</sup>H and (b) <sup>13</sup>C NMR spectra of **2b** in CDCl<sub>3</sub>.

(a)

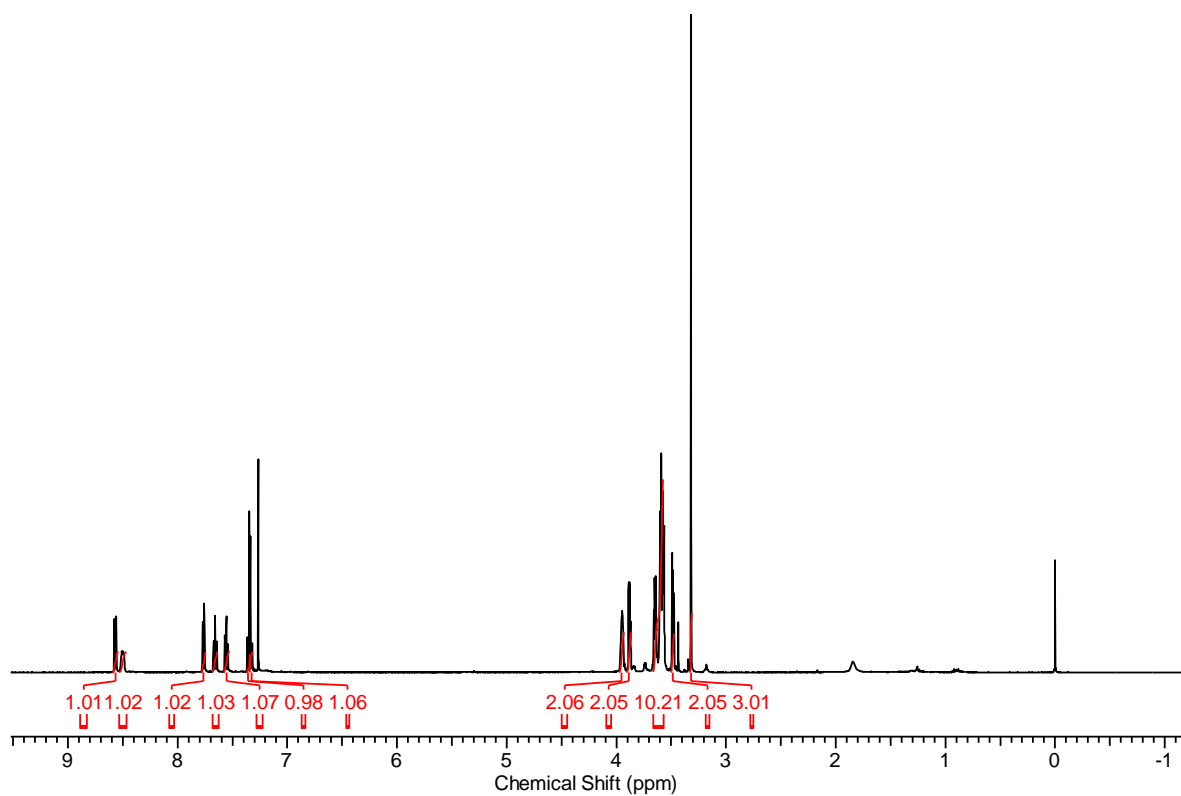

(b)

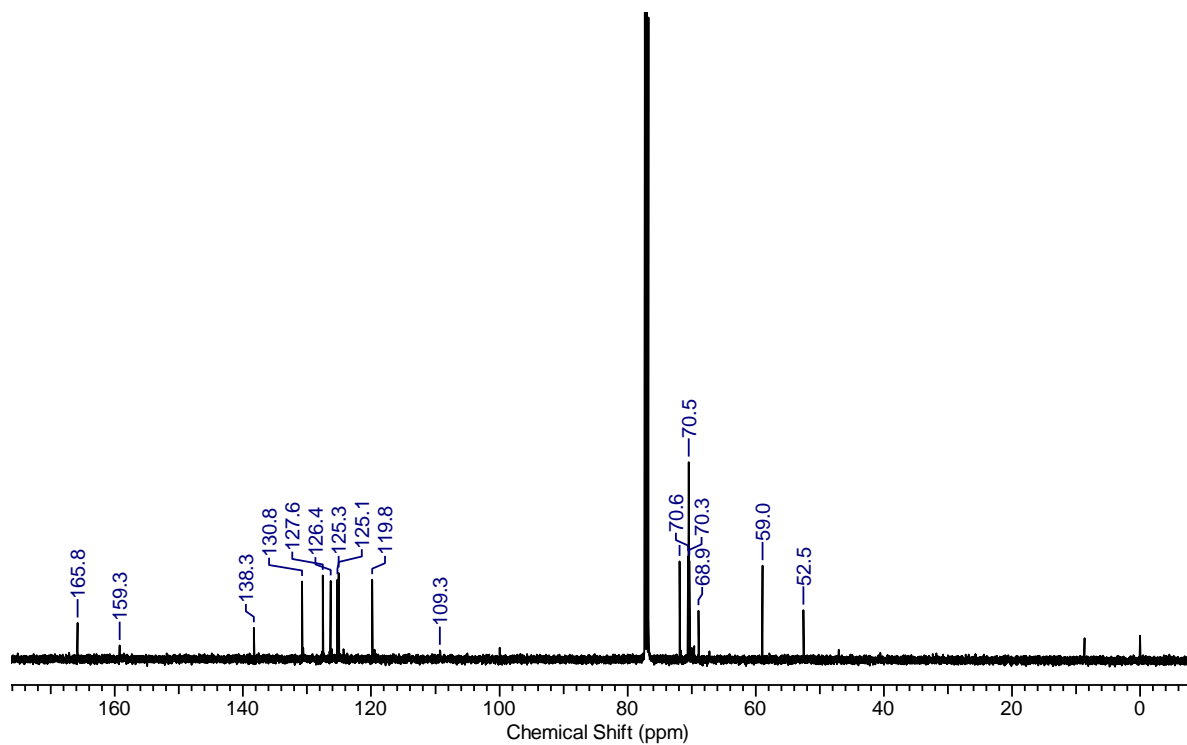

**Fig. S5** (a)  $^1\text{H}$  and (b)  $^{13}\text{C}$  NMR spectra of **3a** in  $\text{CDCl}_3$ .

(a)

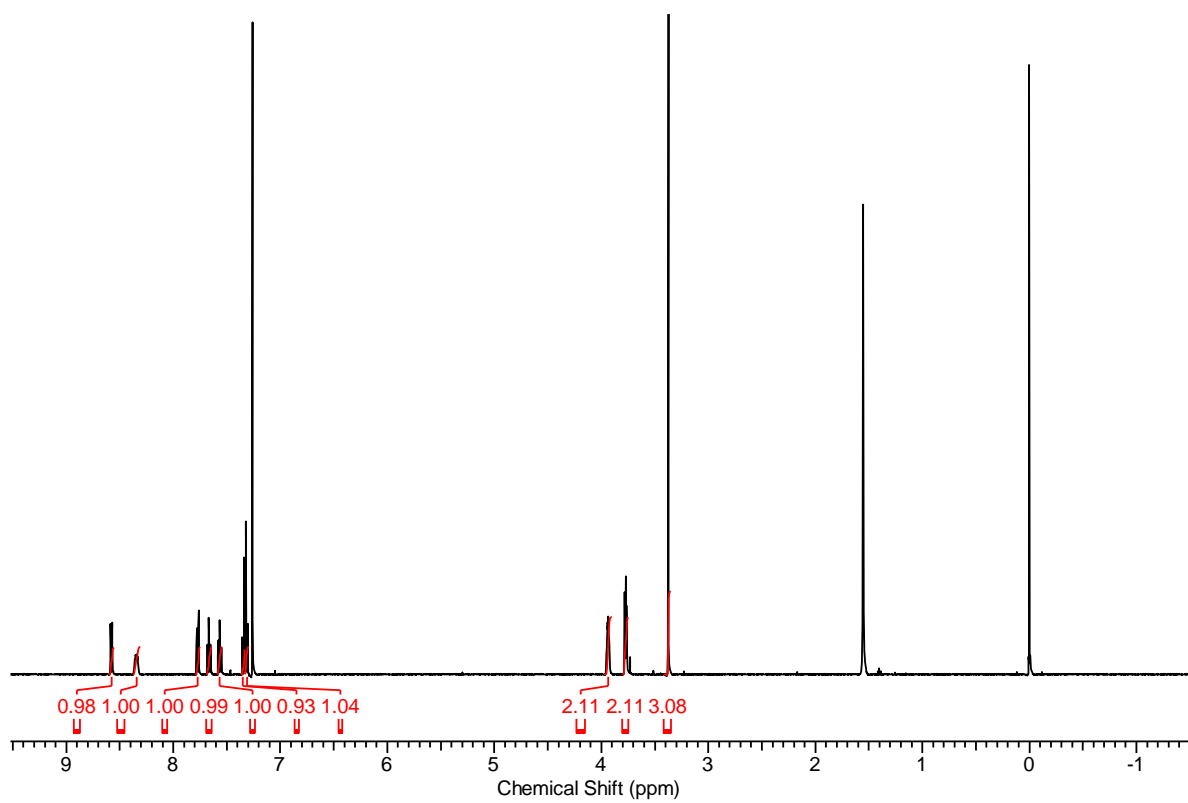

(b)

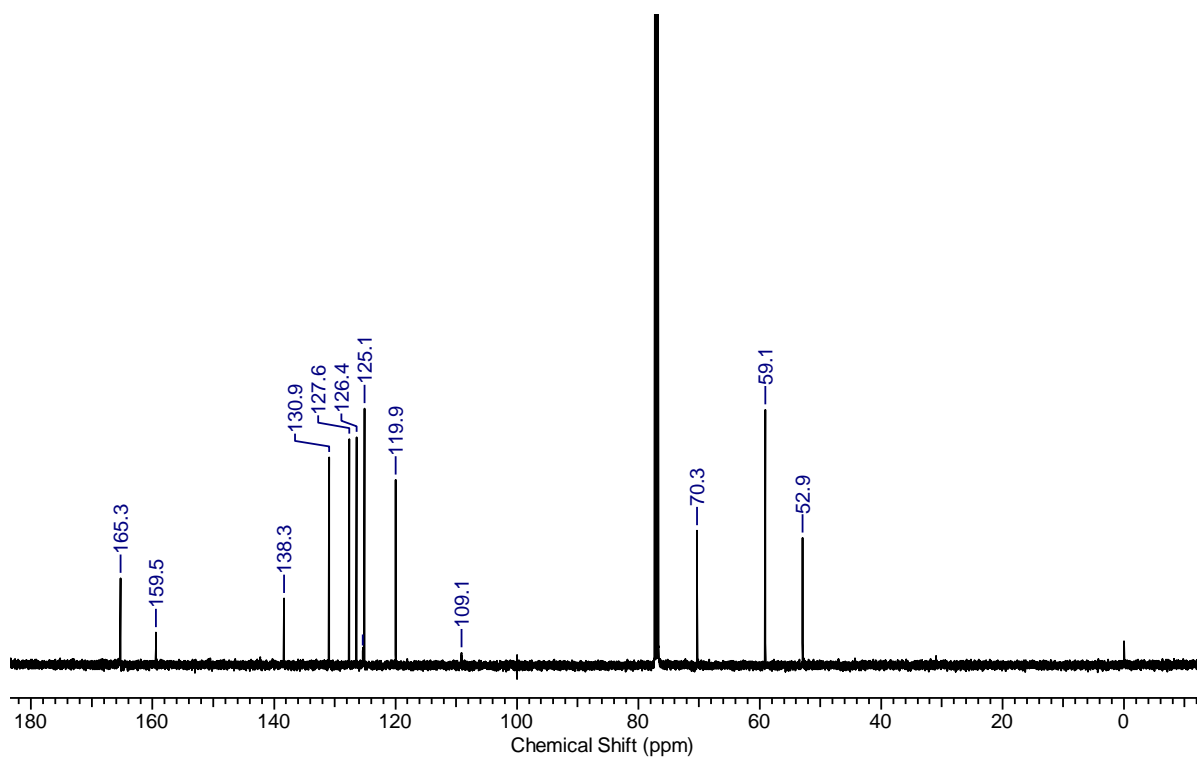

**Fig. S6** (a) <sup>1</sup>H and (b) <sup>13</sup>C NMR spectra of **3b** in CDCl<sub>3</sub>.

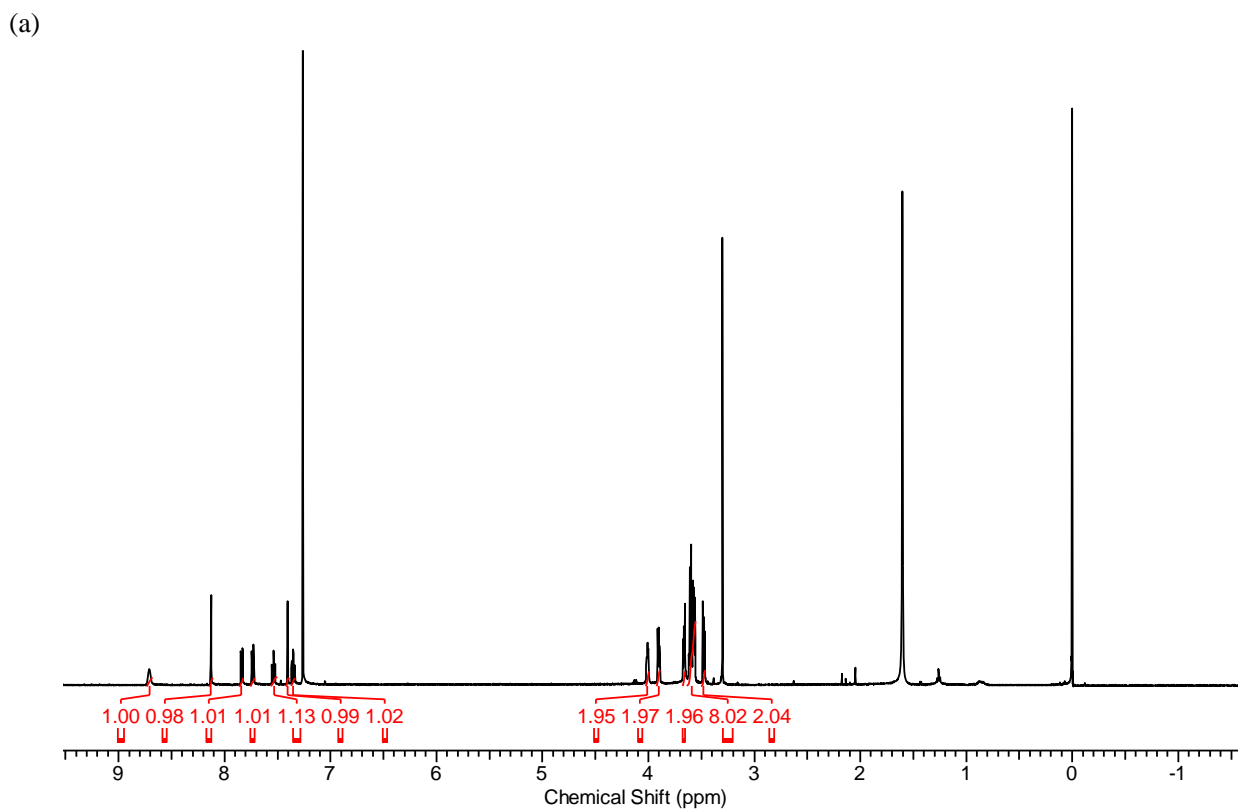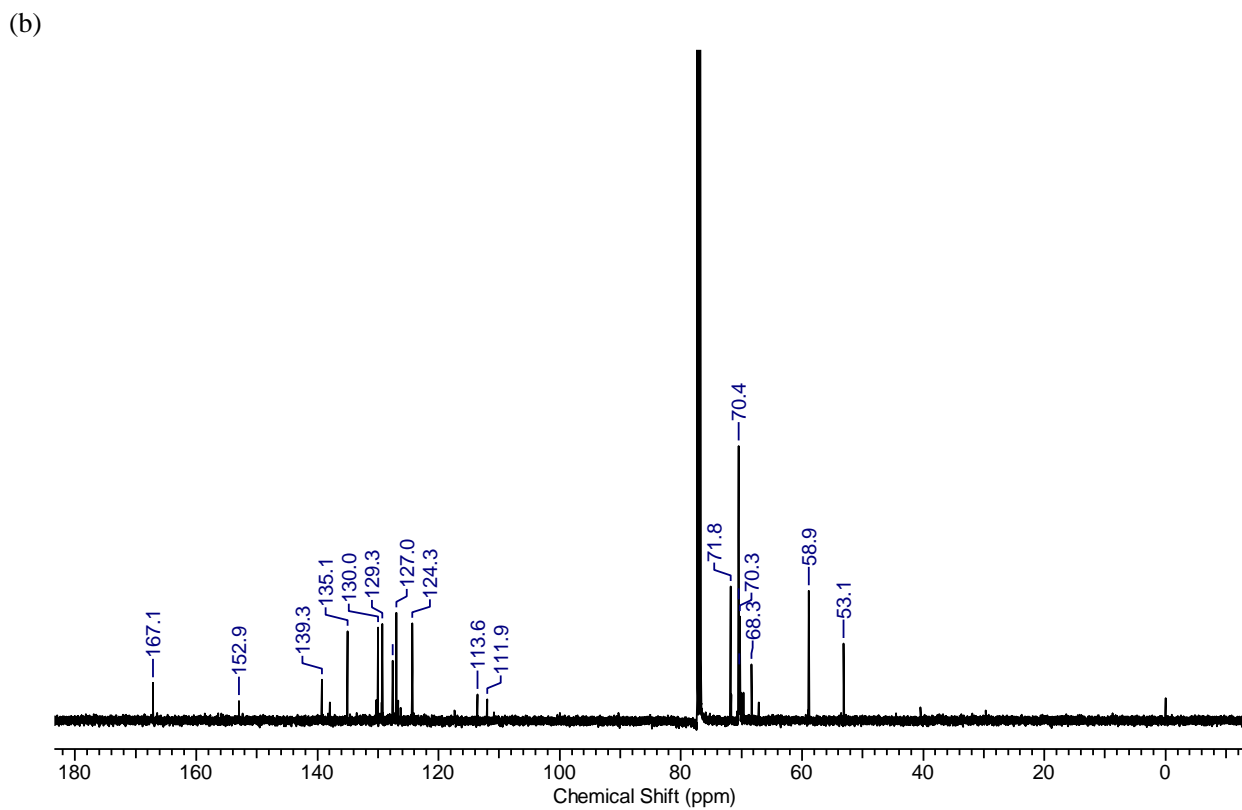

**Fig. S7** (a)  $^1\text{H}$  and (b)  $^{13}\text{C}$  NMR spectra of **4a** in  $\text{CDCl}_3$ .



(a)

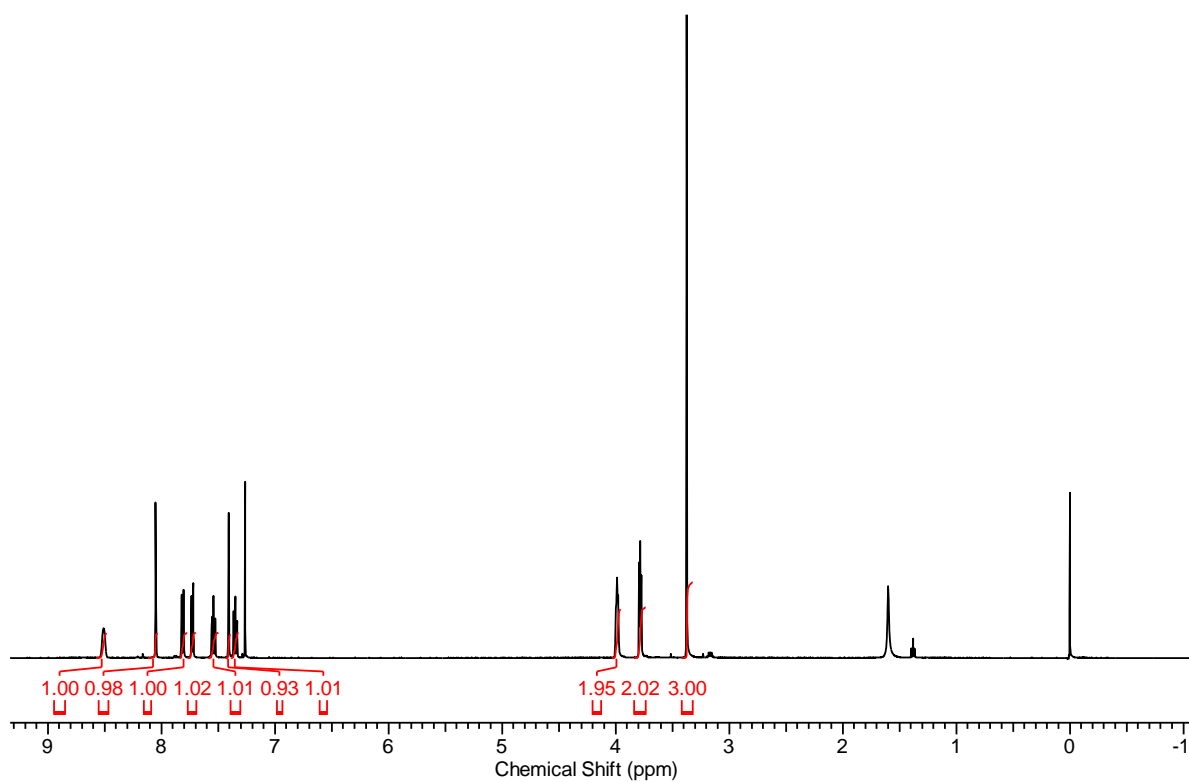

(b)

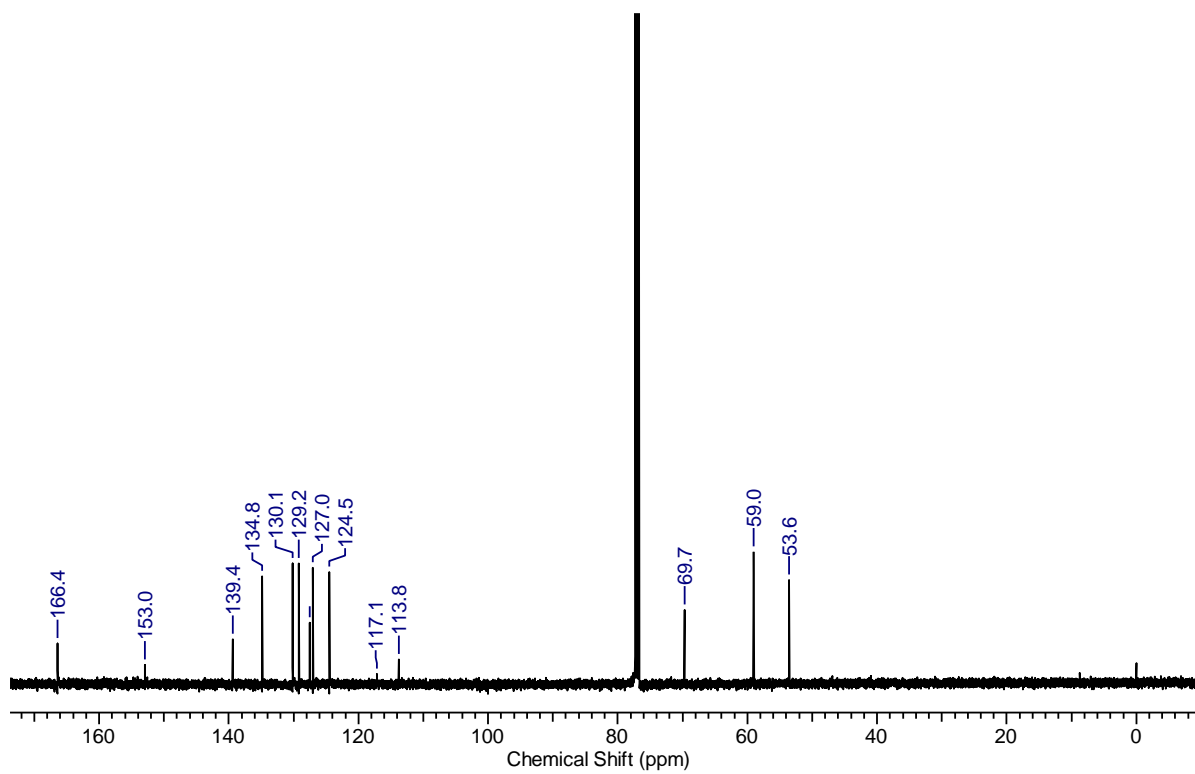

**Fig. S8** (a)  $^1\text{H}$  and (b)  $^{13}\text{C}$  NMR spectra of **4b** in  $\text{CDCl}_3$ .

## 2. Single X-ray Structure Analysis

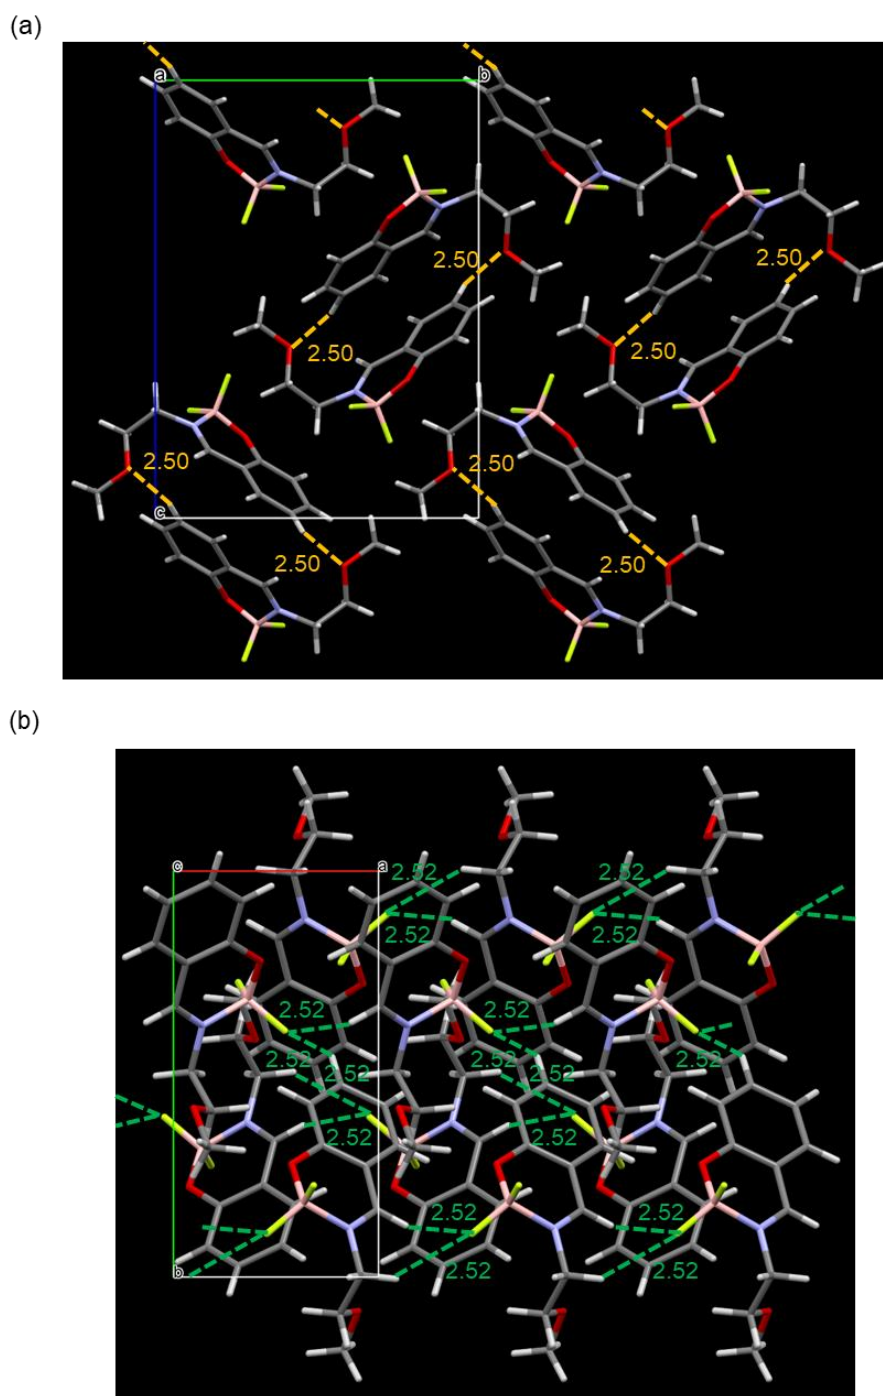

**Fig. S9** Packing structure of **1b**. (a) The *a*-axis and (b) *b*-axis projections showing H··O (orange broken lines) and H··F (green broken lines) interactions.

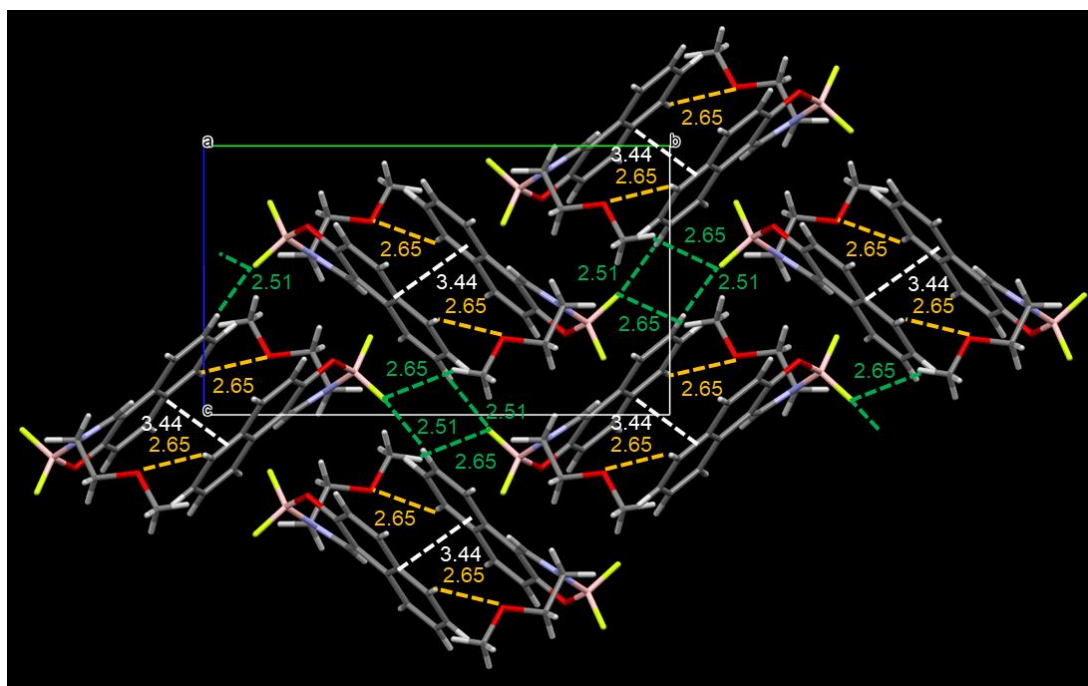

**Fig. S10** Packing structure of **2b**. The *a*-axis projections showing  $\pi$ - $\pi$  (white broken lines), H $\cdots$ O (orange broken lines) and H $\cdots$ F (green broken lines) interactions.

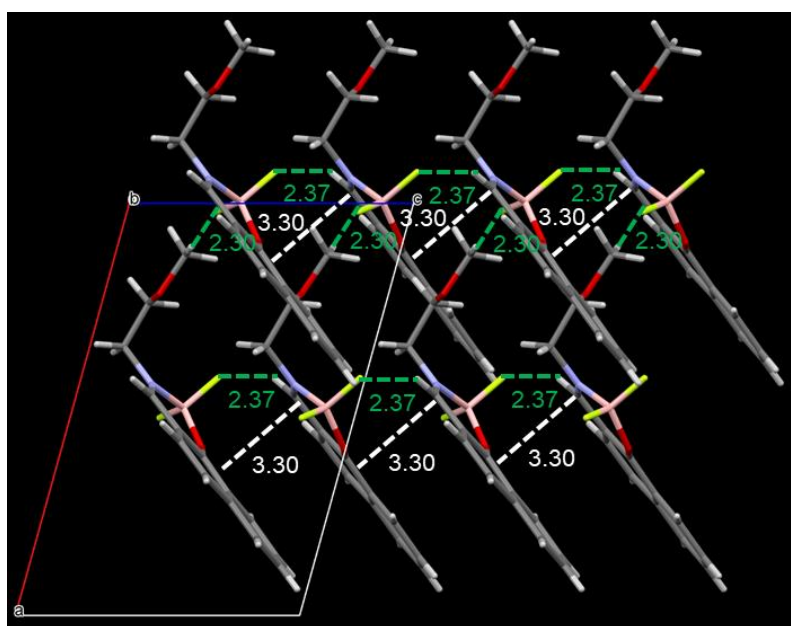

**Fig. S11** Packing structure of **3b**. (a) The *b*-axis projections showing  $\pi$ - $\pi$  (white broken lines) and H $\cdots$ F (green broken lines) interactions.



**Table S1.** Crystal data and structural refinement details for complexes **1b–4b**.

|                                                                   | <b>1b</b>                                                       | <b>2b</b>                                                       | <b>3b</b>                                                       | <b>4b</b>                                                       |
|-------------------------------------------------------------------|-----------------------------------------------------------------|-----------------------------------------------------------------|-----------------------------------------------------------------|-----------------------------------------------------------------|
| Formula                                                           | C <sub>10</sub> H <sub>12</sub> BF <sub>2</sub> NO <sub>2</sub> | C <sub>14</sub> H <sub>14</sub> BF <sub>2</sub> NO <sub>2</sub> | C <sub>14</sub> H <sub>14</sub> BF <sub>2</sub> NO <sub>2</sub> | C <sub>14</sub> H <sub>14</sub> BF <sub>2</sub> NO <sub>2</sub> |
| <i>M<sub>F</sub></i>                                              | 227.02                                                          | 277.07                                                          | 277.07                                                          | 277.07                                                          |
| <i>T</i> [K]                                                      | 113.15                                                          | 113.15                                                          | 113.15                                                          | 113.15                                                          |
| Crystal colour, habit                                             | colourless, needle                                              | colourless, brock                                               | yellow, brock                                                   | yellow, plate                                                   |
| Crystal size [mm]                                                 | 0.425×0.130×0.065                                               | 0.981×0.525×0.348                                               | 0.50×0.50×0.50                                                  | 0.50×0.275×0.15                                                 |
| Crystal system                                                    | orthorhombic                                                    | monoclinic                                                      | monoclinic                                                      | monoclinic                                                      |
| Space group                                                       | <i>P</i> 2 <sub>1</sub> 2 <sub>1</sub> 2 <sub>1</sub> (#19)     | <i>P</i> 2 <sub>1</sub> / <i>n</i> (#14)                        | <i>Cc</i> (#9)                                                  | <i>P</i> 2 <sub>1</sub> / <i>c</i> (#14)                        |
| <i>a</i> [Å]                                                      | 5.8281(11)                                                      | 9.7046(8)                                                       | 12.7885(11)                                                     | 24.5191(14)                                                     |
| <i>b</i> [Å]                                                      | 11.540(2)                                                       | 15.3874(9)                                                      | 12.1016(11)                                                     | 6.0356(3)                                                       |
| <i>c</i> [Å]                                                      | 15.611(2)                                                       | 9.7174(7)                                                       | 8.5177(9)                                                       | 17.3921(9)                                                      |
| <i>α</i> [°]                                                      | 90                                                              | 90                                                              | 90                                                              | 90                                                              |
| <i>β</i> [°]                                                      | 90                                                              | 113.886(8)                                                      | 105.467(10)                                                     | 94.286(5)                                                       |
| <i>γ</i> [°]                                                      | 90                                                              | 90                                                              | 90                                                              | 90                                                              |
| <i>V</i> [Å <sup>3</sup> ]                                        | 1049.9(3)                                                       | 1326.80(18)                                                     | 1269.6(2)                                                       | 2566.6(2)                                                       |
| <i>Z</i>                                                          | 4                                                               | 4                                                               | 4                                                               | 8                                                               |
| <i>D</i> <sub>calcd</sub> [g cm <sup>-3</sup> ]                   | 1.436                                                           | 1.387                                                           | 1.450                                                           | 1.434                                                           |
| Abs coeff (mm <sup>-1</sup> )                                     | 0.121                                                           | 0.110                                                           | 0.115                                                           | 0.113                                                           |
| Abs correct                                                       | multi-scan                                                      | multi-scan                                                      | multi-scan                                                      | multi-scan                                                      |
| Transmiss max/min                                                 | 1.000/0.966                                                     | 0.963/0.900                                                     | 1.000/0.633                                                     | 1.000/0.827                                                     |
| <i>F</i> (000)                                                    | 472                                                             | 576                                                             | 576                                                             | 1152                                                            |
| <i>θ</i> range (°)                                                | 4.39–60.65                                                      | 5.004–60.618                                                    | 4.718–60.818                                                    | 4.698–60.788                                                    |
| Rflns/unique                                                      | 6264/2953                                                       | 7336/3483                                                       | 5208/2822                                                       | 26908/7434                                                      |
| <i>R</i> <sub>int</sub>                                           | 0.0512                                                          | 0.0198                                                          | 0.0257                                                          | 0.0373                                                          |
| Data/params                                                       | 2953/0/146                                                      | 3483/0/182                                                      | 2822/2/190                                                      | 7434/0/363                                                      |
| Largest diff. peak and hole (e Å <sup>-3</sup> )                  | 0.27/–0.29                                                      | 0.31/–0.22                                                      | 0.17/–0.36                                                      | 0.38/–0.28                                                      |
| <i>R</i> <sub>1</sub> ( <i>I</i> > 2σ( <i>I</i> )) <sup>[a]</sup> | 0.0655                                                          | 0.0396                                                          | 0.0386                                                          | 0.0514                                                          |
| <i>wR</i> <sub>2</sub> (all reflections) <sup>[b]</sup>           | 0.1180                                                          | 0.1063                                                          | 0.0971                                                          | 0.1197                                                          |
| Goodness of fit                                                   | 0.980                                                           | 1.084                                                           | 1.018                                                           | 1.015                                                           |
| CCDC No.                                                          | 2298108                                                         | 2298109                                                         | 2298110                                                         | 2298111                                                         |

[a]  $R_1 = \Sigma(|F_o| - |F_c|) / \Sigma(|F_o|)$ . [b]  $wR_2 = [\Sigma(w(F_o^2 - F_c^2)^2) / \Sigma(wF_o^2)^2]^{1/2}$ .

### 3. Photophysical Properties

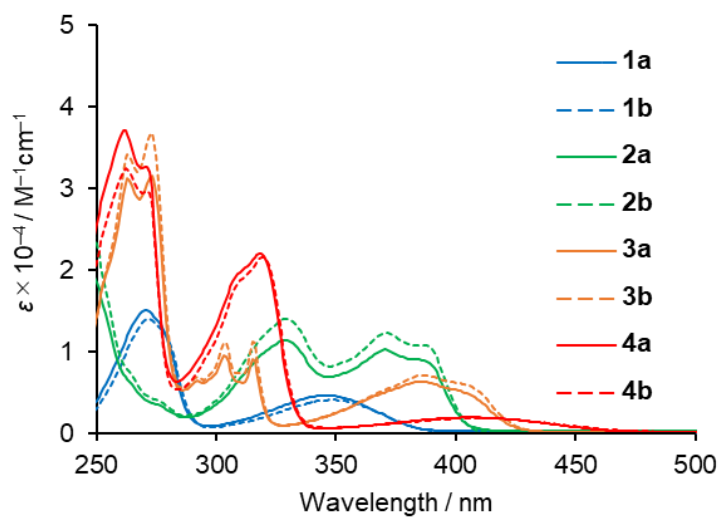

**Fig. S13** UV-vis absorption spectra of  $2.0 \times 10^{-4}$  M solutions of **1a–4a** and **1b–4b** in  $\text{CH}_2\text{Cl}_2$  at 298 K.

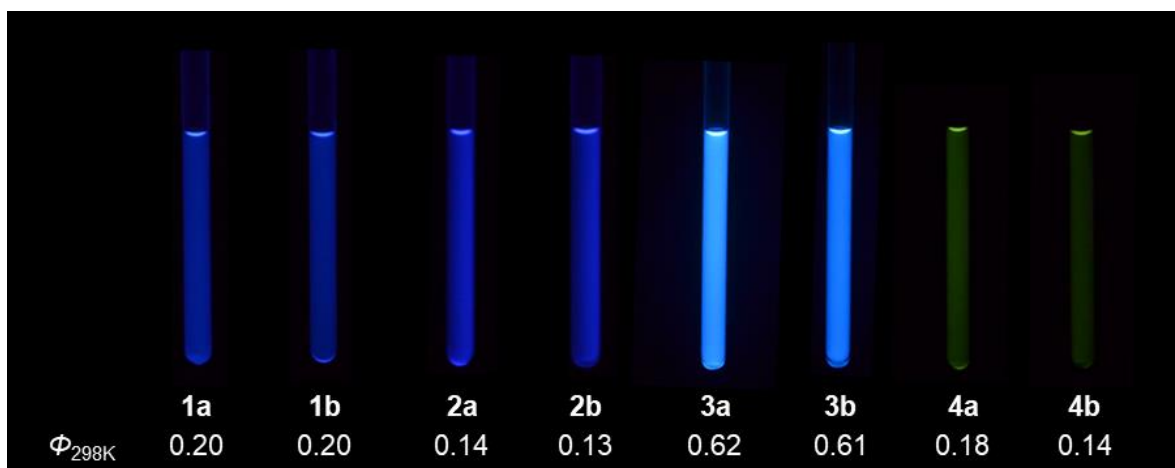

**Fig. S14** Photographs of  $2.0 \times 10^{-4}$  M solutions of **1a–4a** and **1b–4b** in  $\text{CH}_2\text{Cl}_2$  at 298 K under UV illumination at 365 nm.

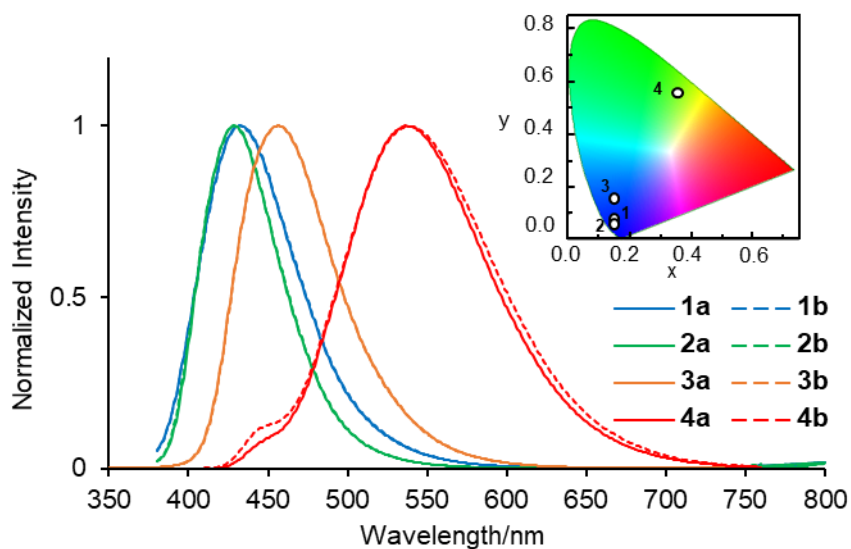

**Fig. S15** Normalized emission spectra of  $2.0 \times 10^{-4}$  M solutions of **1a–4a** and **1b–4b** in  $\text{CH}_2\text{Cl}_2$  ( $\lambda_{\text{ex}} = 350$  (**1a–3a** and **1b–3b**), 400 nm (**4a** and **4b**)). The inset shows the CIE colour coordinates of the emissions.

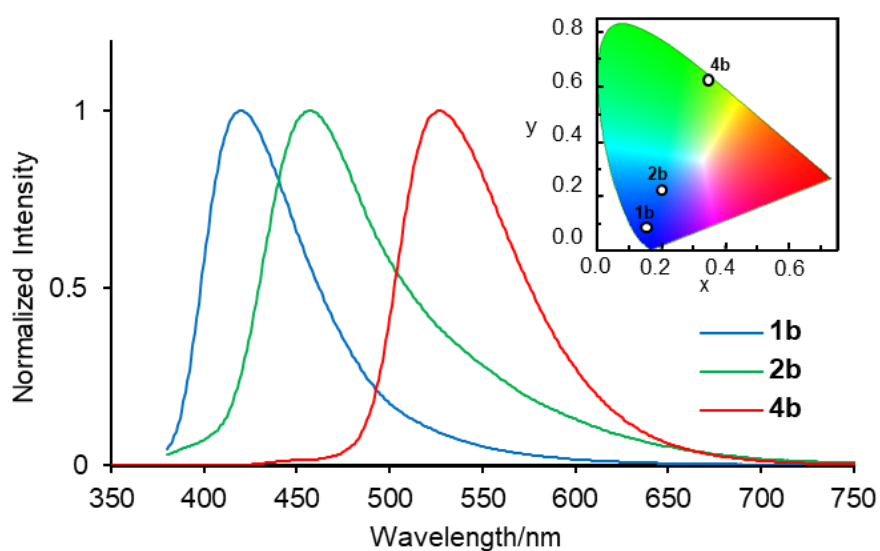

**Fig. S16** Normalized emission spectra of crystals of **1b**, **2b** and **4b** ( $\lambda_{\text{ex}} = 350$  (**1b** and **2b**), 400 nm (**4b**)). The inset shows the CIE colour coordinates of the emissions.

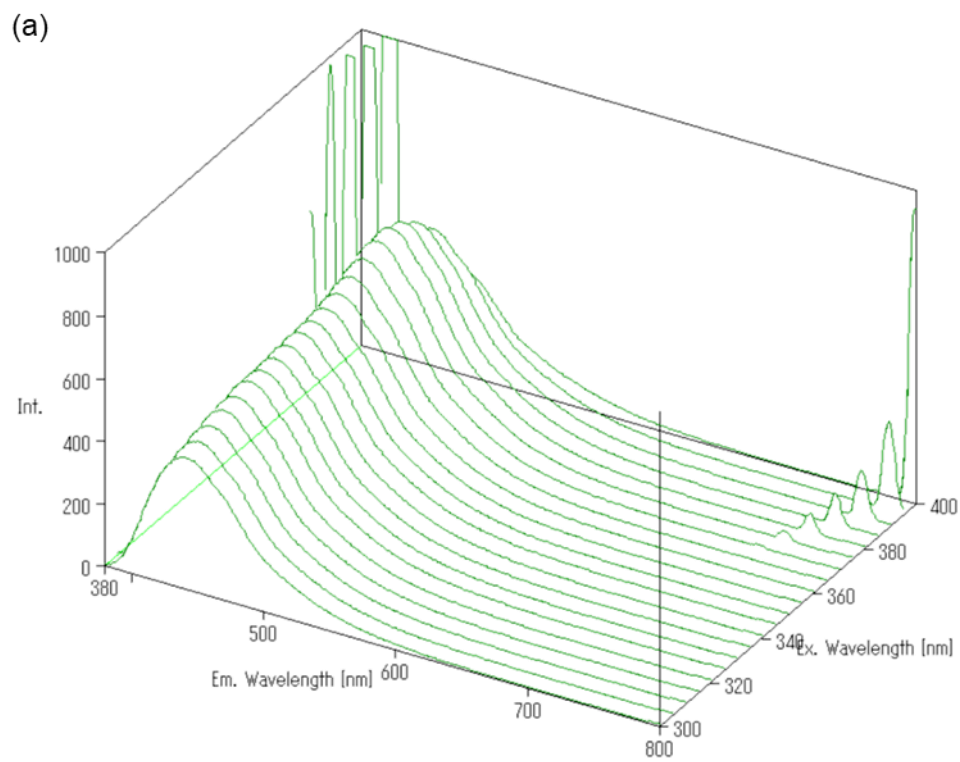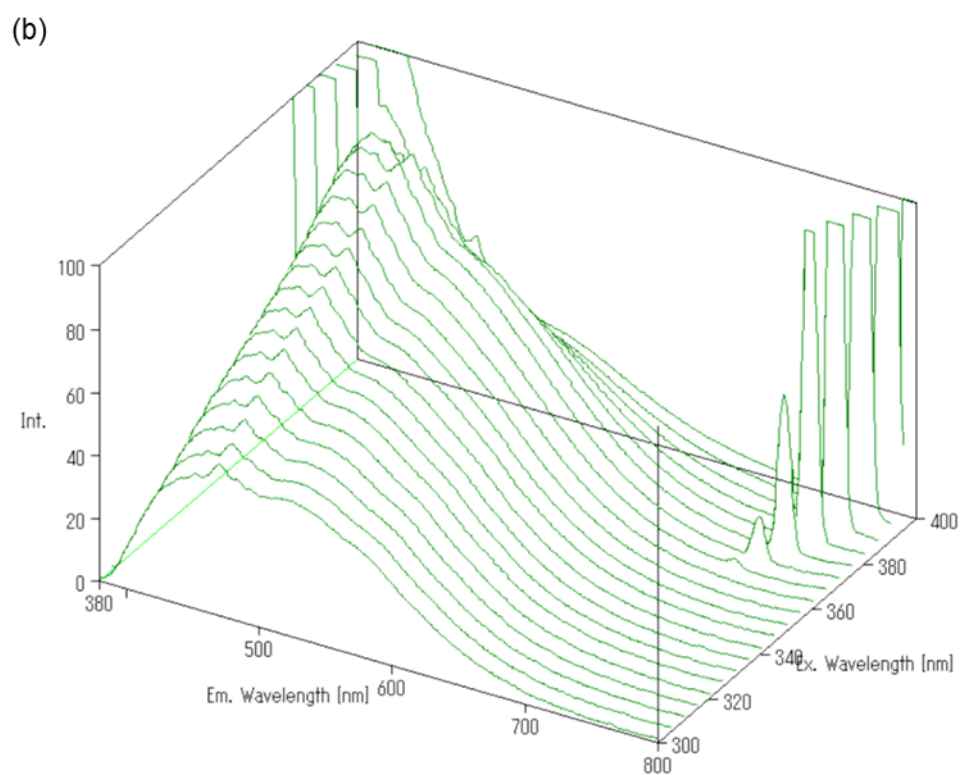

**Fig. S17** Emission spectra of (a) **1a** in the solvent-free liquid state and (b) composite **V** by exciting at different wavelengths (300-400 nm).



## 4. Computational Methods

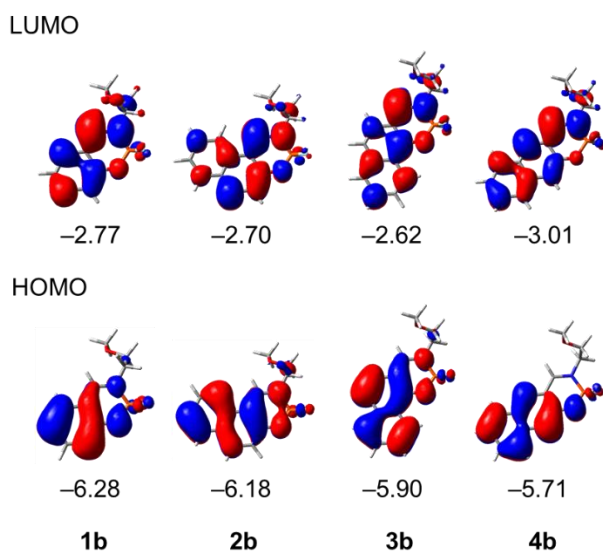

**Fig. S18** Molecular orbitals (overhead views) and eigenvalues [eV] for the frontier orbitals of **1b–4b** estimated from DFT calculations (B3LYP/6-31+G(d,p)) on the basis of the optimized geometries in the  $S_1$  excited states.

**Table S2.** Selected data for excitation energy, major configuration, coefficient, and oscillator strength for **1b–4b** (for the geometries optimized in the  $S_0$  state).<sup>[a]</sup>

| Compound  | State | Excitation energy (eV) | Major configuration <sup>[b]</sup> | Coefficient | Oscillator strength |
|-----------|-------|------------------------|------------------------------------|-------------|---------------------|
| <b>1b</b> | $S_1$ | 3.60 (345 nm)          | HOMO→LUMO                          | 0.695       | 0.0839              |
| <b>2b</b> | $S_1$ | 3.43 (361 nm)          | HOMO→LUMO                          | 0.697       | 0.1536              |
| <b>3b</b> | $S_1$ | 3.24 (383 nm)          | HOMO→LUMO                          | 0.693       | 0.1171              |
| <b>4b</b> | $S_1$ | 2.82 (439 nm)          | HOMO→LUMO                          | 0.699       | 0.0281              |

[a] Estimated by TD-DFT (B3LYP/6-31+G(d,p)) calculations based on the optimized geometries. [b] Molecular orbitals are shown in Fig. 6.

**Table S3.** Selected data for excitation energy, major configuration, coefficient, and oscillator strength for **1b–4b** (for the geometries optimized in the  $S_1$  state).<sup>[a]</sup>

| Compound  | State | Excitation energy (eV) | Major configuration <sup>[b]</sup> | Coefficient | Oscillator strength |
|-----------|-------|------------------------|------------------------------------|-------------|---------------------|
| <b>1b</b> | $S_1$ | 2.98 (417 nm)          | HOMO→LUMO                          | 0.702       | 0.0593              |
| <b>2b</b> | $S_1$ | 3.11 (399 nm)          | HOMO→LUMO                          | 0.700       | 0.1429              |
| <b>3b</b> | $S_1$ | 2.85 (436 nm)          | HOMO→LUMO                          | 0.699       | 0.0974              |
| <b>4b</b> | $S_1$ | 2.16 (574 nm)          | HOMO→LUMO                          | 0.705       | 0.0220              |

[a] Estimated by TD-DFT (B3LYP/6-31+G(d,p)) calculations based on the optimized geometries. [b] Molecular orbitals are shown in Fig. S18.

## 5. Cartesian Coordinates (in Å)

**Table S4.** Cartesian coordinates (in angstrom) of **1b** in  $S_0$  state<sup>[a]</sup>.

| atom | x         | y         | z         |
|------|-----------|-----------|-----------|
| F    | 1.100486  | 2.023845  | 1.154181  |
| F    | 0.253734  | 2.768013  | -0.85016  |
| O    | -1.113017 | 1.490993  | 0.583145  |
| O    | 2.810681  | -1.595824 | 0.034293  |
| N    | 0.79614   | 0.435785  | -0.638801 |
| C    | 0.04841   | -0.604319 | -0.859774 |
| H    | 0.483063  | -1.451763 | -1.388573 |
| C    | -1.843537 | 0.422976  | 0.307531  |
| C    | -1.311615 | -0.672348 | -0.426497 |
| C    | -2.117467 | -1.802029 | -0.695841 |
| H    | -1.691478 | -2.630201 | -1.256832 |
| C    | -3.175335 | 0.356953  | 0.761041  |
| H    | -3.571574 | 1.196174  | 1.322319  |
| C    | -3.945154 | -0.762944 | 0.481197  |
| H    | -4.972157 | -0.79934  | 0.833855  |
| C    | -3.425978 | -1.852239 | -0.249735 |
| H    | -4.046662 | -2.717477 | -0.45647  |
| C    | 2.204829  | 0.435639  | -1.059663 |
| H    | 2.503177  | 1.473927  | -1.216733 |
| H    | 2.299155  | -0.102241 | -2.008713 |
| C    | 3.11387   | -0.209614 | -0.018839 |
| H    | 4.162323  | -0.05643  | -0.321649 |
| H    | 2.959272  | 0.262625  | 0.960381  |
| C    | 3.499102  | -2.280055 | 1.070419  |
| H    | 3.18859   | -3.325886 | 1.024709  |
| H    | 3.243667  | -1.868417 | 2.05729   |
| H    | 4.588813  | -2.222144 | 0.931387  |
| B    | 0.24576   | 1.742099  | 0.091183  |

[a] The geometry was optimized by DFT calculation (B3LYP/6-31+G (d,p)).

**Table S5.** Cartesian coordinates (in angstrom) of **2b** in S<sub>0</sub> state<sup>[a]</sup>.

| atom | x         | y         | z         |
|------|-----------|-----------|-----------|
| F    | -2.510857 | -1.54929  | 1.202906  |
| F    | -2.625806 | -2.483134 | -0.896567 |
| O    | -0.542569 | -2.328225 | 0.163732  |
| O    | -2.571593 | 2.384219  | 0.204386  |
| N    | -1.664895 | -0.279473 | -0.663348 |
| C    | 0.691248  | -0.314102 | -0.208942 |
| C    | -0.500245 | 0.311     | -0.676204 |
| H    | -0.462766 | 1.31619   | -1.085806 |
| C    | 1.971289  | 0.363646  | -0.185819 |
| C    | 0.599497  | -1.670496 | 0.173985  |
| C    | 1.770135  | -2.389177 | 0.54933   |
| H    | 1.659192  | -3.432597 | 0.822938  |
| C    | 2.144129  | 1.731266  | -0.516375 |
| H    | 1.290617  | 2.340437  | -0.793577 |
| C    | 3.128585  | -0.380472 | 0.203251  |
| C    | 2.983936  | -1.758007 | 0.559989  |
| H    | 3.874351  | -2.309524 | 0.851293  |
| C    | -2.852458 | 0.437858  | -1.148393 |
| H    | -3.577718 | -0.309942 | -1.474918 |
| H    | -2.577391 | 1.055492  | -2.009905 |
| C    | 4.396075  | 0.251719  | 0.234336  |
| H    | 5.262262  | -0.33338  | 0.532425  |
| C    | 3.394396  | 2.323743  | -0.479157 |
| H    | 3.494904  | 3.373889  | -0.737644 |
| C    | 4.53471   | 1.583359  | -0.103688 |
| H    | 5.509713  | 2.059754  | -0.076891 |
| C    | -3.47263  | 1.321214  | -0.07005  |
| H    | -4.430802 | 1.717073  | -0.443899 |
| H    | -3.665063 | 0.731087  | 0.835933  |
| B    | -1.866828 | -1.713068 | -0.026293 |
| C    | -2.966843 | 3.181572  | 1.310648  |
| H    | -3.029604 | 2.582438  | 2.230087  |
| H    | -3.940521 | 3.660638  | 1.129685  |
| H    | -2.206458 | 3.955226  | 1.43571   |

[a] The geometry was optimized by DFT calculation (B3LYP/6-31+G(d,p)).

**Table S6.** Cartesian coordinates (in angstrom) of **3b** in S<sub>0</sub> state<sup>[a]</sup>.

| atom | x         | y         | z         |
|------|-----------|-----------|-----------|
| F    | -1.722131 | 2.092492  | 1.000438  |
| F    | -1.205973 | 2.65648   | -1.167296 |
| O    | 0.324535  | 1.386574  | 0.089554  |
| O    | -3.838611 | -1.442802 | 0.437614  |
| N    | -1.815602 | 0.375648  | -0.694286 |
| C    | 0.228739  | -0.870845 | -0.661647 |
| C    | 2.336137  | 0.138934  | 0.114013  |
| C    | 0.92878   | 0.24231   | -0.154385 |
| C    | 2.99758   | -1.101625 | -0.146199 |
| C    | 4.386458  | -1.18918  | 0.121995  |
| H    | 4.899301  | -2.127289 | -0.072432 |
| C    | 0.918341  | -2.098979 | -0.912029 |
| H    | 0.353513  | -2.941626 | -1.302352 |
| C    | 5.082817  | -0.104645 | 0.62188   |
| H    | 6.147169  | -0.191575 | 0.820903  |
| C    | -4.059086 | -0.04741  | 0.29313   |
| C    | -1.167302 | -0.737055 | -0.903035 |
| H    | -1.727691 | -1.594399 | -1.273235 |
| C    | 3.068064  | 1.238244  | 0.625398  |
| H    | 2.543406  | 2.168382  | 0.812822  |
| C    | 4.421136  | 1.118213  | 0.876046  |
| H    | 4.978918  | 1.963198  | 1.267919  |
| C    | -3.267032 | 0.43702   | -0.916828 |
| H    | -3.526214 | -0.173111 | -1.788487 |
| H    | -3.525031 | 1.475737  | -1.13297  |
| C    | 2.256859  | -2.214246 | -0.664431 |
| H    | 2.777188  | -3.147828 | -0.855389 |
| C    | -4.416344 | -1.981463 | 1.616952  |
| H    | -5.508987 | -1.853076 | 1.620835  |
| H    | -3.99913  | -1.507539 | 2.516989  |
| H    | -4.18238  | -3.047971 | 1.629955  |
| B    | -1.095682 | 1.686096  | -0.176084 |
| H    | -3.73929  | 0.49388   | 1.193578  |
| H    | -5.128493 | 0.156637  | 0.121493  |

[a] The geometry was optimized by DFT calculation (B3LYP/6-31+G(d,p)).

**Table S7.** Cartesian coordinates (in angstrom) of **4b** in S<sub>0</sub> state<sup>[a]</sup>.

| atom | x         | y         | z         |
|------|-----------|-----------|-----------|
| F    | 2.309346  | -1.587798 | 1.343972  |
| F    | 2.374112  | -2.72228  | -0.657795 |
| O    | 0.302875  | -2.022475 | 0.174801  |
| O    | 3.378565  | 2.083527  | 0.142171  |
| N    | 1.945998  | -0.343635 | -0.683429 |
| C    | -0.66409  | -1.116269 | 0.051442  |
| C    | -0.376642 | 0.187087  | -0.481166 |
| C    | -2.724399 | 0.822379  | -0.29144  |
| C    | -3.011101 | -0.487461 | 0.238955  |
| C    | -1.396437 | 1.122419  | -0.646061 |
| H    | -1.159981 | 2.103121  | -1.053436 |
| C    | 0.969918  | 0.490081  | -0.86888  |
| H    | 1.184627  | 1.44831   | -1.340558 |
| C    | -1.969522 | -1.430876 | 0.394292  |
| H    | -2.179692 | -2.419722 | 0.788902  |
| C    | -3.784484 | 1.764573  | -0.443074 |
| H    | -3.554807 | 2.748583  | -0.84397  |
| C    | 3.315716  | 0.028512  | -1.067516 |
| H    | 3.284645  | 0.624349  | -1.985615 |
| H    | 3.861995  | -0.895274 | -1.266368 |
| C    | -4.3591   | -0.787927 | 0.59332   |
| H    | -4.586191 | -1.771874 | 0.993967  |
| C    | -5.071832 | 1.437392  | -0.089821 |
| H    | -5.873638 | 2.159647  | -0.208058 |
| C    | 4.020766  | 0.822247  | 0.028379  |
| H    | 3.975724  | 0.274568  | 0.978774  |
| H    | 5.077388  | 0.952467  | -0.255912 |
| C    | -5.35721  | 0.146035  | 0.433687  |
| H    | -6.377777 | -0.103079 | 0.709975  |
| B    | 1.72942   | -1.739397 | 0.080185  |
| C    | 3.843116  | 2.850882  | 1.243159  |
| H    | 3.281912  | 3.787542  | 1.239639  |
| H    | 4.916026  | 3.074594  | 1.148946  |
| H    | 3.669846  | 2.327055  | 2.193762  |

[a] The geometry was optimized by DFT calculation (B3LYP/6-31+G(d,p)).

**Table S8.** Cartesian coordinates (in angstrom) of **1b** in S<sub>1</sub> state<sup>[a]</sup>.

| atom | x         | y         | z         |
|------|-----------|-----------|-----------|
| F    | 0.824796  | 1.842585  | 1.34022   |
| F    | 0.386669  | 2.824762  | -0.696744 |
| O    | -1.265199 | 1.529339  | 0.334318  |
| O    | 2.996464  | -1.519566 | -0.008499 |
| N    | 0.800599  | 0.449547  | -0.635734 |
| C    | 0.093382  | -0.681196 | -0.816313 |
| H    | 0.580766  | -1.547484 | -1.244898 |
| C    | -1.926169 | 0.409468  | 0.17078   |
| C    | -1.298357 | -0.744638 | -0.402141 |
| C    | -2.078519 | -1.873724 | -0.533474 |
| H    | -1.642764 | -2.772776 | -0.961772 |
| C    | -3.289271 | 0.374636  | 0.569224  |
| H    | -3.705699 | 1.282906  | 0.992237  |
| C    | -4.066613 | -0.796218 | 0.417131  |
| H    | -5.106109 | -0.807067 | 0.724427  |
| C    | -3.46683  | -1.913436 | -0.128122 |
| H    | -4.021877 | -2.835729 | -0.264161 |
| C    | 2.197322  | 0.491799  | -1.050409 |
| H    | 2.466289  | 1.538928  | -1.21465  |
| H    | 2.310682  | -0.041385 | -2.003505 |
| C    | 3.166226  | -0.109035 | -0.031822 |
| H    | 4.197597  | 0.14271   | -0.332447 |
| H    | 2.978827  | 0.319459  | 0.96271   |
| C    | 3.764746  | -2.153856 | 0.999176  |
| H    | 3.563037  | -3.225337 | 0.931919  |
| H    | 3.485075  | -1.795243 | 2.000851  |
| H    | 4.841915  | -1.982064 | 0.850378  |
| B    | 0.223852  | 1.693828  | 0.089406  |

[a] The geometry was optimized by DFT calculation (B3LYP/6-31+G (d,p)).

**Table S9.** Cartesian coordinates (in angstrom) of **2b** in S<sub>1</sub> state<sup>[a]</sup>.

| atom | x         | y         | z         |
|------|-----------|-----------|-----------|
| F    | -2.437083 | -1.608882 | 1.219281  |
| F    | -2.586703 | -2.529358 | -0.887661 |
| O    | -0.491042 | -2.353454 | 0.133342  |
| O    | -2.625066 | 2.402641  | 0.180642  |
| N    | -1.676663 | -0.308263 | -0.66551  |
| C    | 0.701381  | -0.305417 | -0.24441  |
| C    | -0.503092 | 0.32744   | -0.689978 |
| H    | -0.500363 | 1.343081  | -1.063417 |
| C    | 1.959029  | 0.358345  | -0.185642 |
| C    | 0.651193  | -1.69979  | 0.157663  |
| C    | 1.813833  | -2.389748 | 0.548982  |
| H    | 1.705087  | -3.433391 | 0.823422  |
| C    | 2.103501  | 1.752149  | -0.513438 |
| H    | 1.226773  | 2.324548  | -0.790812 |
| C    | 3.14242   | -0.374553 | 0.213937  |
| C    | 3.044771  | -1.754187 | 0.572553  |
| H    | 3.941111  | -2.288747 | 0.86881   |
| C    | -2.87836  | 0.390956  | -1.103583 |
| H    | -3.615454 | -0.362731 | -1.392544 |
| H    | -2.647123 | 1.002395  | -1.985662 |
| C    | 4.366219  | 0.305208  | 0.233351  |
| H    | 5.261366  | -0.239717 | 0.52089   |
| C    | 3.332877  | 2.394953  | -0.477458 |
| H    | 3.406015  | 3.447382  | -0.729109 |
| C    | 4.473584  | 1.66907   | -0.106928 |
| H    | 5.445252  | 2.152043  | -0.075661 |
| C    | -3.485905 | 1.290511  | -0.025657 |
| H    | -4.475815 | 1.635637  | -0.368812 |
| H    | -3.614867 | 0.72317   | 0.906164  |
| B    | -1.832241 | -1.73039  | -0.038554 |
| C    | -3.01587  | 3.211131  | 1.27845   |
| H    | -3.010298 | 2.638744  | 2.217385  |
| H    | -4.020584 | 3.63398   | 1.126702  |
| H    | -2.293799 | 4.027651  | 1.350475  |

[a] The geometry was optimized by DFT calculation (B3LYP/6-31+G(d,p)).

**Table S10.** Cartesian coordinates (in angstrom) of **3b** in  $S_1$  state<sup>[a]</sup>.

| atom | x         | y         | z         |
|------|-----------|-----------|-----------|
| F    | -1.661298 | 2.11024   | 1.014981  |
| F    | -1.163203 | 2.642645  | -1.165572 |
| O    | 0.362405  | 1.375535  | 0.088075  |
| O    | -3.997166 | -1.412821 | 0.38797   |
| N    | -1.823029 | 0.377073  | -0.659308 |
| C    | 0.220245  | -0.895095 | -0.630022 |
| C    | 2.366097  | 0.125163  | 0.110551  |
| C    | 0.956312  | 0.225171  | -0.14516  |
| C    | 3.052129  | -1.123707 | -0.12476  |
| C    | 4.449892  | -1.21205  | 0.130995  |
| H    | 4.952124  | -2.158512 | -0.050776 |
| C    | 0.918265  | -2.085909 | -0.843337 |
| H    | 0.373059  | -2.952852 | -1.208568 |
| C    | 5.162154  | -0.117315 | 0.601918  |
| H    | 6.226925  | -0.194152 | 0.793885  |
| C    | -4.110242 | -0.000356 | 0.275343  |
| C    | -1.19318  | -0.785876 | -0.875562 |
| H    | -1.765301 | -1.641674 | -1.214247 |
| C    | 3.110052  | 1.218762  | 0.586443  |
| H    | 2.60041   | 2.159311  | 0.763197  |
| C    | 4.484201  | 1.097307  | 0.827672  |
| H    | 5.03387   | 1.958648  | 1.195511  |
| C    | -3.257496 | 0.472832  | -0.900771 |
| H    | -3.521136 | -0.115831 | -1.789391 |
| H    | -3.49529  | 1.520103  | -1.106858 |
| C    | 2.307433  | -2.214215 | -0.601686 |
| H    | 2.795112  | -3.166179 | -0.788049 |
| C    | -4.651574 | -1.931658 | 1.532195  |
| H    | -5.731214 | -1.717034 | 1.509496  |
| H    | -4.22876  | -1.51523  | 2.458604  |
| H    | -4.504291 | -3.014126 | 1.525199  |
| B    | -1.084898 | 1.662231  | -0.175719 |
| H    | -3.775928 | 0.490051  | 1.200077  |
| H    | -5.161019 | 0.280812  | 0.089715  |

[a] The geometry was optimized by DFT calculation (B3LYP/6-31+G(d,p)).



**Table S11.** Cartesian coordinates (in angstrom) of **4b** in  $S_1$  state<sup>[a]</sup>.

| atom | x         | y         | z         |
|------|-----------|-----------|-----------|
| F    | 2.367483  | -1.843186 | 1.246508  |
| F    | 2.105285  | -2.769191 | -0.842908 |
| O    | 0.232075  | -1.936099 | 0.287799  |
| O    | 3.564133  | 2.078777  | 0.129237  |
| N    | 1.973844  | -0.369075 | -0.628206 |
| C    | -0.692582 | -1.037694 | 0.097053  |
| C    | -0.363859 | 0.257148  | -0.466106 |
| C    | -2.772349 | 0.849293  | -0.281972 |
| C    | -3.08142  | -0.435332 | 0.270128  |
| C    | -1.40284  | 1.146948  | -0.63214  |
| H    | -1.192614 | 2.129122  | -1.050833 |
| C    | 0.999828  | 0.541384  | -0.818244 |
| H    | 1.265634  | 1.507935  | -1.228717 |
| C    | -2.018731 | -1.359704 | 0.448275  |
| H    | -2.201655 | -2.34612  | 0.862575  |
| C    | -3.804225 | 1.769258  | -0.462981 |
| H    | -3.581188 | 2.747281  | -0.881101 |
| C    | 3.345735  | -0.03383  | -0.991965 |
| H    | 3.346452  | 0.541264  | -1.926931 |
| H    | 3.882741  | -0.969013 | -1.173365 |
| C    | -4.415327 | -0.737117 | 0.614686  |
| H    | -4.643535 | -1.713669 | 1.032646  |
| C    | -5.136277 | 1.450808  | -0.111655 |
| H    | -5.91883  | 2.187419  | -0.263924 |
| C    | 4.094627  | 0.760999  | 0.076451  |
| H    | 3.99425   | 0.264752  | 1.05183   |
| H    | 5.164903  | 0.795867  | -0.189501 |
| C    | -5.440367 | 0.202925  | 0.424823  |
| H    | -6.461256 | -0.045428 | 0.695643  |
| B    | 1.715605  | -1.750381 | 0.017314  |
| C    | 4.115244  | 2.856072  | 1.177354  |
| H    | 3.644807  | 3.840922  | 1.130583  |
| H    | 5.203817  | 2.973282  | 1.061061  |
| H    | 3.912221  | 2.404848  | 2.159978  |

[a] The geometry was optimized by DFT calculation (B3LYP/6-31+G(d,p)).
